# Supplementary figures and images for: Optical properties of ZnFe2O4nanoparticles and Fe-decorated inversion domain boundaries in ZnO
Source: Royal Society of Chemistry journal article supplement (doi:10.1039/d2na00849a), 2023-01-01

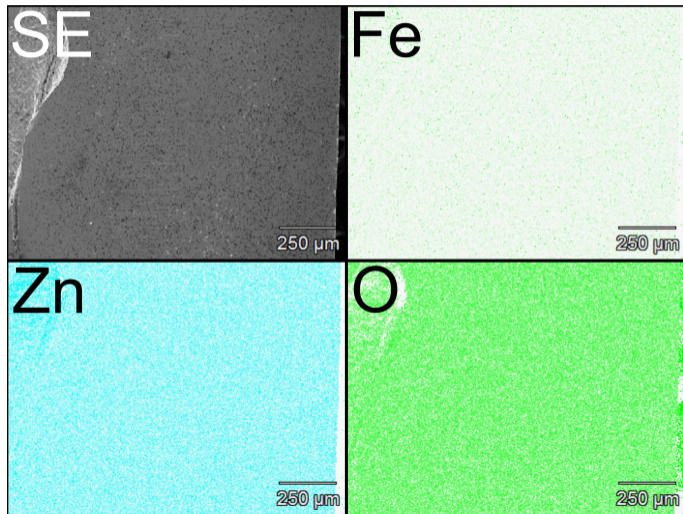

Supplement: d2na00849a2.pdf [file d2na00849a2.pdf]

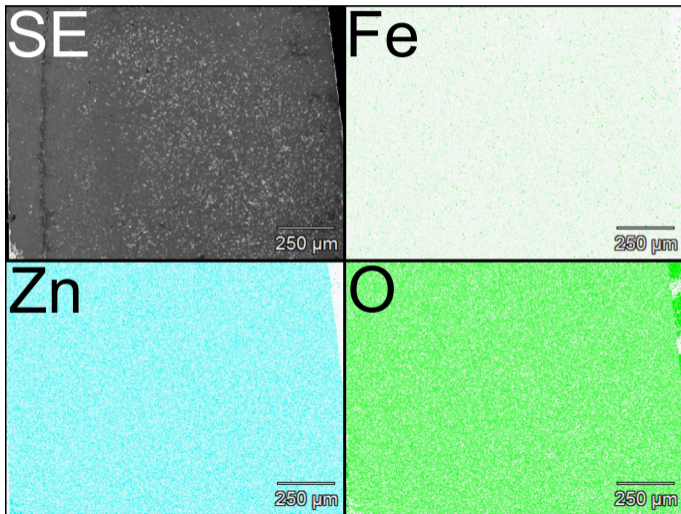

Supplement: d2na00849a3.pdf [file d2na00849a3.pdf]

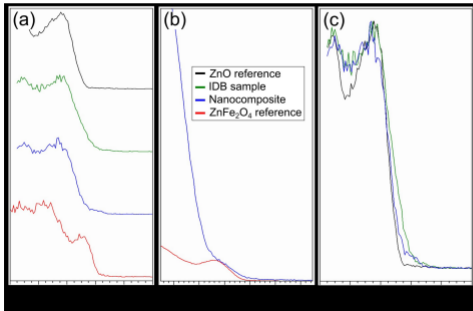

Supplement: d2na00849a6.pdf [file d2na00849a6.pdf]

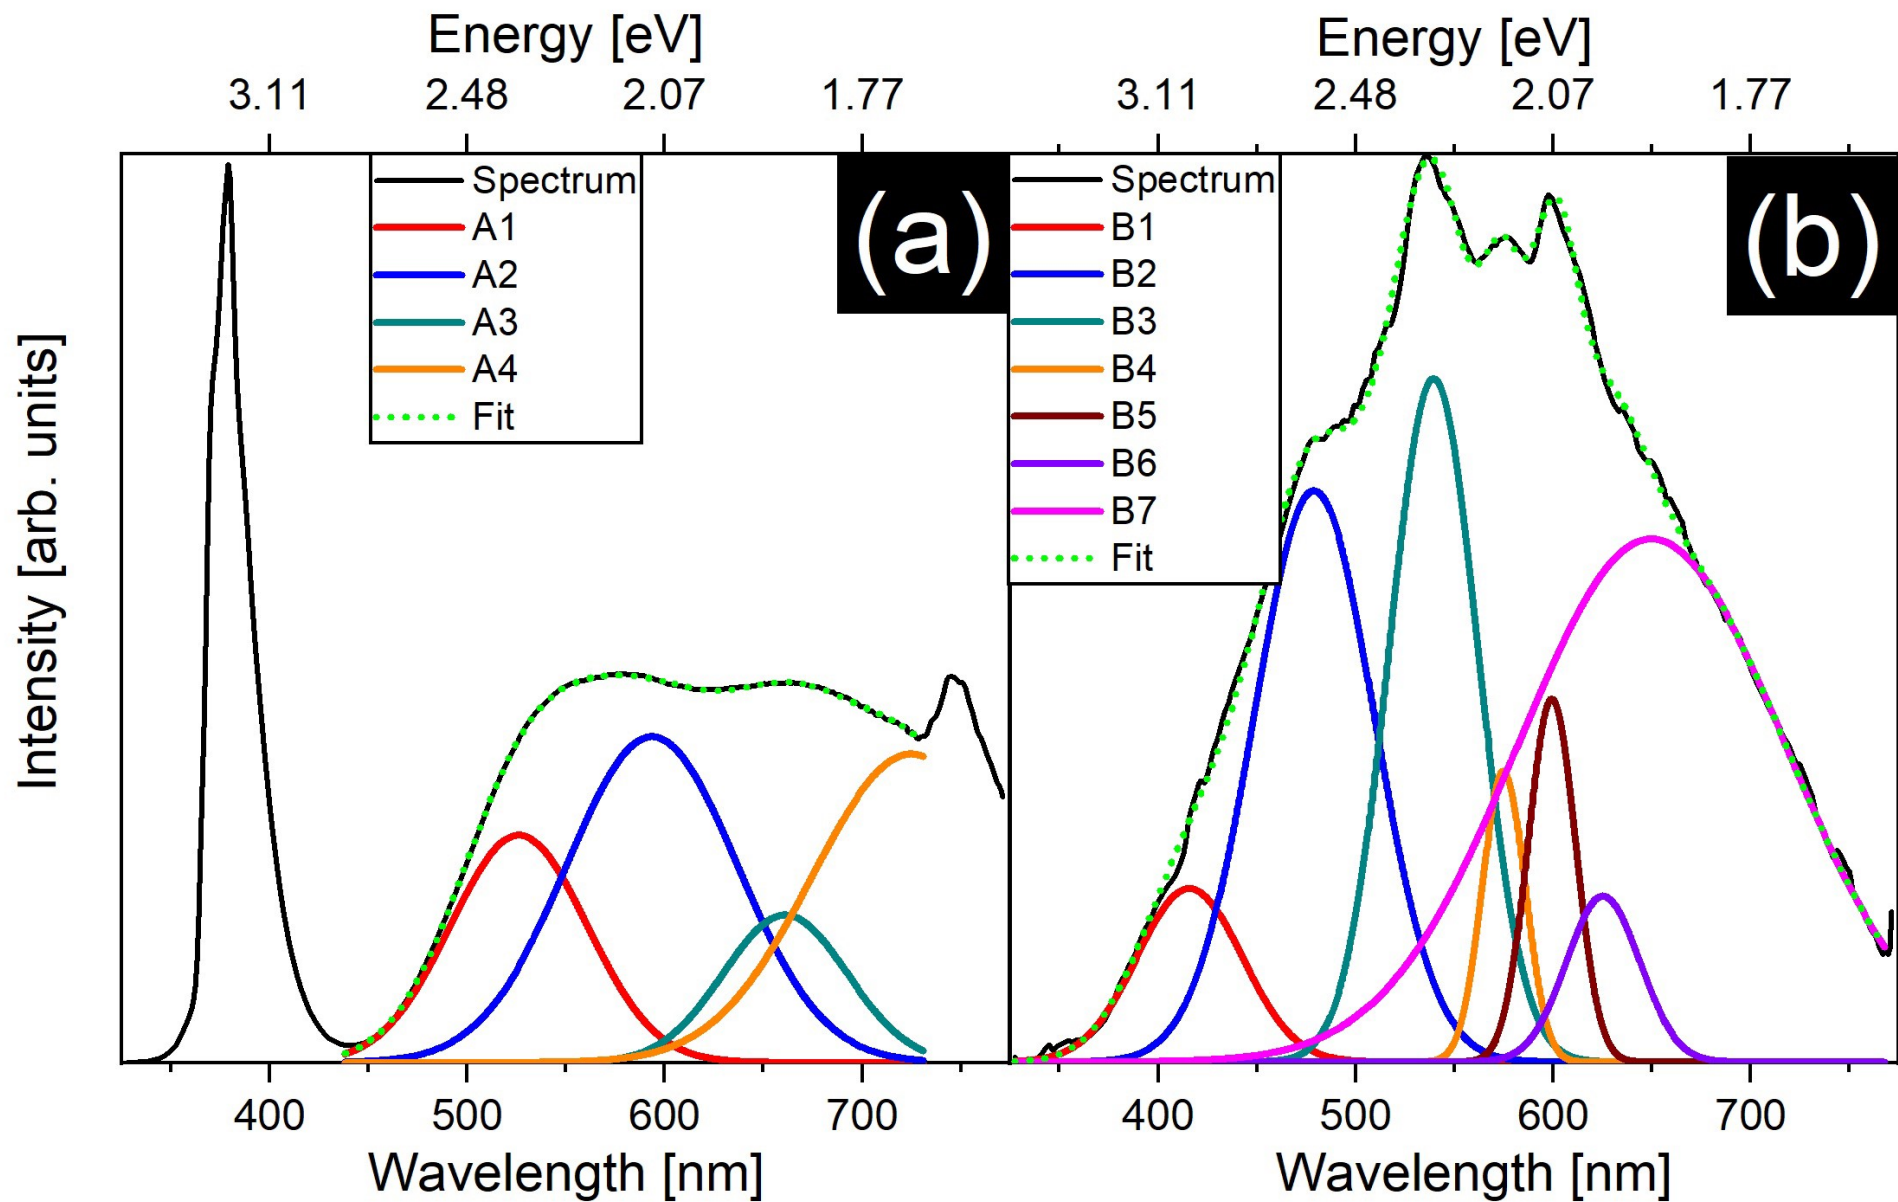

Supplement: d2na00849a7.pdf [file d2na00849a7.pdf]
